# Supplementary material
Source: PubMed Central journal article supplement (PMC6085790)
Supplement: tpmd170631.SD1.pdf [file tpmd170631.SD1.pdf]

SUPPLEMENTAL TABLE 1

Hospital-onset *S. aureus* bacteremia cases per 1,000 hospitalizations stratified by hospital-type, Sa Kaeo and Nakhon Phanom provinces, Thailand

|                                                | 2009               | 2010              | 2011              | 2012               | 2013              | 2014              | Total              |
|------------------------------------------------|--------------------|-------------------|-------------------|--------------------|-------------------|-------------------|--------------------|
| Provincial hospital cases                      | 6                  | 10                | 21                | 13                 | 16                | 10                | 76                 |
| Hospitalizations                               | 50,325             | 49,683            | 50,619            | 52,165             | 52,623            | 50,851            | 306,266            |
| Provincial hospital incidence rate<br>(95% CI) | 0.12<br>(0.04–0.3) | 0.20<br>(0.1–0.4) | 0.41<br>(0.3–0.6) | 0.25<br>(0.1–0.4)  | 0.30<br>(0.2–0.5) | 0.20<br>(0.1–0.4) | 0.25<br>(0.2–0.3)  |
| District hospital cases                        | 4                  | 0                 | 2                 | 4                  | 1                 | 2                 | 13                 |
| Hospitalizations                               | 67,088             | 69,117            | 65,093            | 66,675             | 71,733            | 68,168            | 407,874            |
| District hospital incidence rate<br>(95% CI)   | 0.06<br>(0.02–0.2) | 0.00<br>(0–0.05)  | 0.03<br>(0–0.11)  | 0.06<br>(0.02–0.2) | 0.01<br>(0–0.1)   | 0.03<br>(0–0.1)   | 0.03<br>(0.02–0.1) |

CI = confidence interval.
